# Supplementary material
Source: HighWire-hosted journal article supplement (https://bibliotheek.ehb.be/content/88/5/430)
Supplement: inline-supplementary-material-1 [file inline-supplementary-material-1.pdf]

## Appendix 1. Summary table of the primary and secondary outcome measures

| Health domain                         | Instrument                                                                                                | Score range                                                                                                                          | Interpretation                                     |
|---------------------------------------|-----------------------------------------------------------------------------------------------------------|--------------------------------------------------------------------------------------------------------------------------------------|----------------------------------------------------|
| Health-related quality of life (HRQL) | 36-item Short Form Health Survey (SF-36)<br><br>(8 subscales, 2 Summary scores)                           | 0-100 for each subscale<br><br>Summary scores are normalized to a general Dutch population mean of 50 and a standard deviation of 10 | Higher scores indicate a better HRQL               |
| Pain                                  | 100 mm VAS                                                                                                | 0-100                                                                                                                                | Higher scores indicate more pain                   |
| Pain                                  | 13-item Pain Catastrophizing Scale (PCS)                                                                  | 0-52                                                                                                                                 | Higher scores indicate higher pain catastrophizing |
| Somatization                          | 12-item somatization subscale of the Symptom Checklist-90 (SL-90)                                         | 12-60                                                                                                                                | Higher scores indicate more somatization           |
| Anxiety and depression                | Hospital Anxiety and Depression scale (HADS)<br><br>(7-item anxiety subscale, 7-item depression subscale) | 0-21 for each subscale                                                                                                               | Higher scores indicate more emotional distress     |
| Disability in ADL                     | 25-item AMC Linear Disability Score (ALDS)                                                                | 0-100                                                                                                                                | Higher scores indicate a better functional status  |
| General well-being                    | 100mm VAS                                                                                                 | 0-100                                                                                                                                | Higher scores indicate a better well-being         |
